# Supplementary material
Source: PubMed Central journal article supplement (PMC4143588)
Supplement: NIHMS59953-supplement-Supplementary_Appendix.pdf [file NIHMS59953-supplement-Supplementary_Appendix.pdf]

## Supplementary Appendix

This appendix has been provided by the authors to give readers additional information about their work.

Supplement to: Clatworthy MR, Watson CJE, Plotnek G, et al. B-cell-depleting induction therapy and acute cellular rejection. *N Engl J Med* 2009;360:2683-5.

**SUPPLEMENTARY TABLE 1: Baseline patient characteristics and adverse events.**

|                                                       | <b>Daclizumab group</b>     | <b>Rituximab group</b>     |
|-------------------------------------------------------|-----------------------------|----------------------------|
| <b>Total patients</b>                                 | 7                           | 6                          |
| <b>Male (%)</b>                                       | 57                          | 67                         |
| <b>Age at transplant (median years+range)</b>         | 42.1(27-58)                 | 44.7(23-64)                |
| <b>Cause of end stage renal failure</b>               |                             |                            |
| <i>Autosomal dominant polycystic kidney disease</i>   | 0                           | 4                          |
| <i>IgA nephropathy</i>                                | 2                           | 0                          |
| <i>Henoch-Schönlein purpura</i>                       | 2                           | 0                          |
| <i>Sjögren's syndrome</i>                             | 1                           | 0                          |
| <i>Unknown</i>                                        | 2                           | 2                          |
| <b>Dialysis mode</b>                                  |                             |                            |
| <i>Pre-dialysis</i>                                   | 1                           | 0                          |
| <i>PD</i>                                             | 4                           | 3                          |
| <i>HD</i>                                             | 2                           | 3                          |
| <b>Time on dialysis (months)</b>                      | 2.3                         | 2.7                        |
| Median(range)                                         | (0-76)                      | (11-108)                   |
| <b>Type of transplant</b>                             |                             |                            |
| <i>Living</i>                                         | 4                           | 0                          |
| <i>Donation after brainstem death</i>                 | 1                           | 6                          |
| <i>Donation after cardiac death</i>                   | 2                           | 0                          |
| <b>CMV mismatch</b>                                   | 3/7                         | 1/6                        |
| <b>Cold ischaemic time (median hours,mins+ range)</b> | 3hr 48m<br>(1hr56m-11hr49m) | 10hr 17m<br>(6hr6m-20h14m) |
| <b>Infections at 12 months*:</b>                      |                             |                            |
| <i>Minor</i>                                          | 14                          | 16                         |
| <i>Major (requiring hospitalisation)</i>              | 3                           | 6                          |
| <i>Life-threatening</i>                               | 0                           | 0                          |
| <b>Other adverse events at 12 months</b>              |                             |                            |
| <i>Malignancy</i>                                     | 0                           | 0                          |
| <i>Cardiovascular</i>                                 | 3                           | 2                          |
| <i>Neutropaenia</i>                                   | 2                           | 3                          |
| <i>Post-transplant diabetes</i>                       | 2                           | 2                          |
| <i>Urethral stricture</i>                             | 1                           | 2                          |

\* Patients received a three month course of valganciclovir as prophylaxis against cytomegalovirus if the donor was sero-positive and the recipient sero-negative. All recipients received cotrimoxazole for 6 months and oral amphotericin for 4 weeks following transplantation.

## SUPPLEMENTARY FIGURES

### SUPPLEMENTARY FIGURE 1

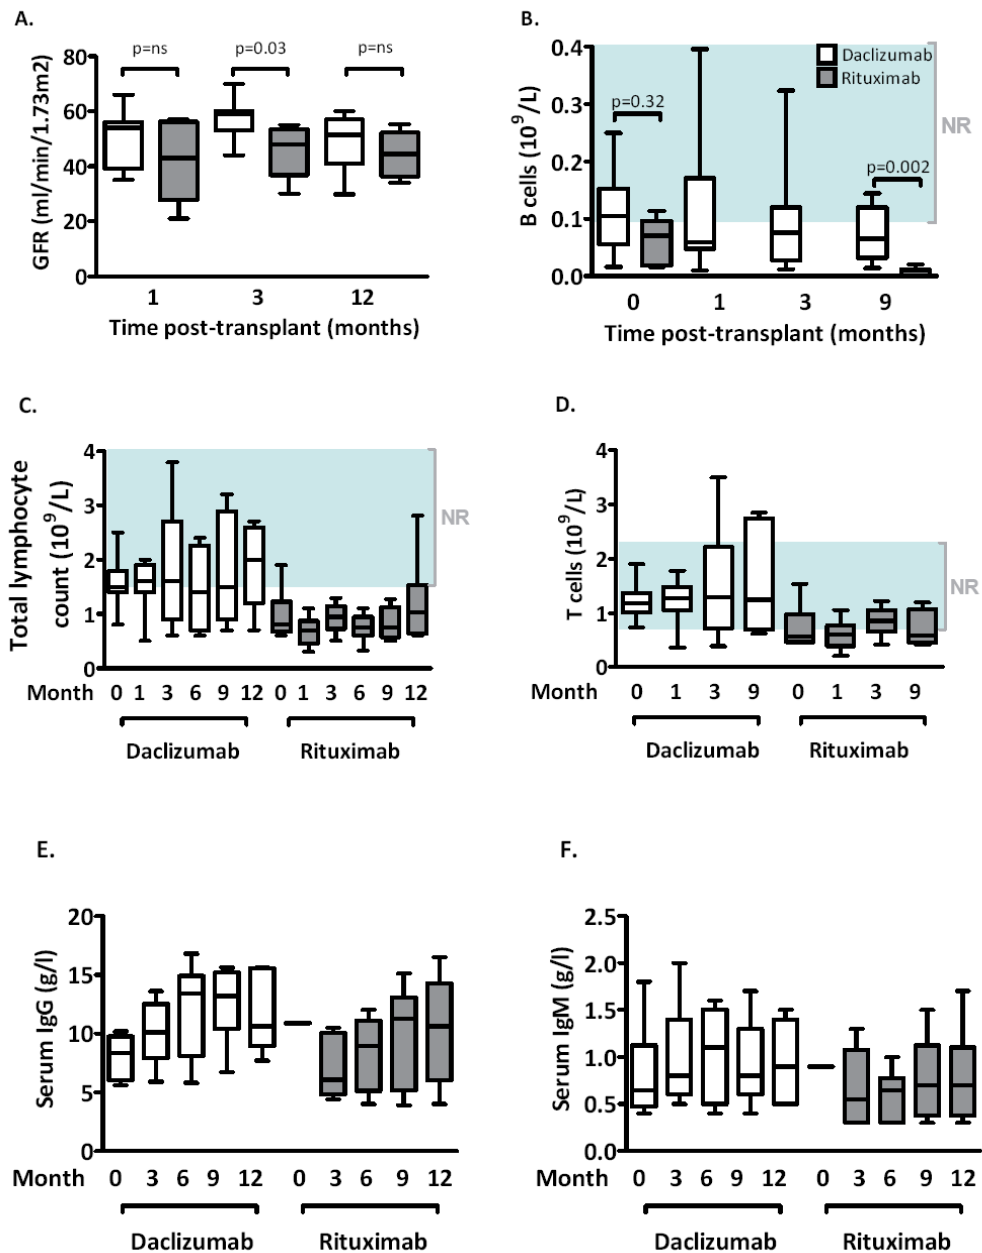

**A.** Glomerular filtration rate (GFR) normalised for body surface area, **B.** B cell counts (Normal range (NR) shown by shaded area) **C.** Total lymphocyte count, **D.** T cell counts, **E.** IgM, and **F.** IgG, in daclizumab (open boxes) versus rituximab-treated (grey boxes) patients. Whiskers show minimum and maximum values, and lines show medians. Values in the daclizumab and rituximab groups are compared using a Mann Whitney test. All patients were mildly lymphopaenic prior to transplantation (**C**) a well-recognised phenomenon in patients with end-stage renal disease (Yoon JW *et al.* *Kidney Int* 2006;70:371-6). There was no significant fall in mean total lymphocyte count or CD3 count in either of the study groups following transplantation (**D**).

SUPPLEMENTARY FIGURE 2

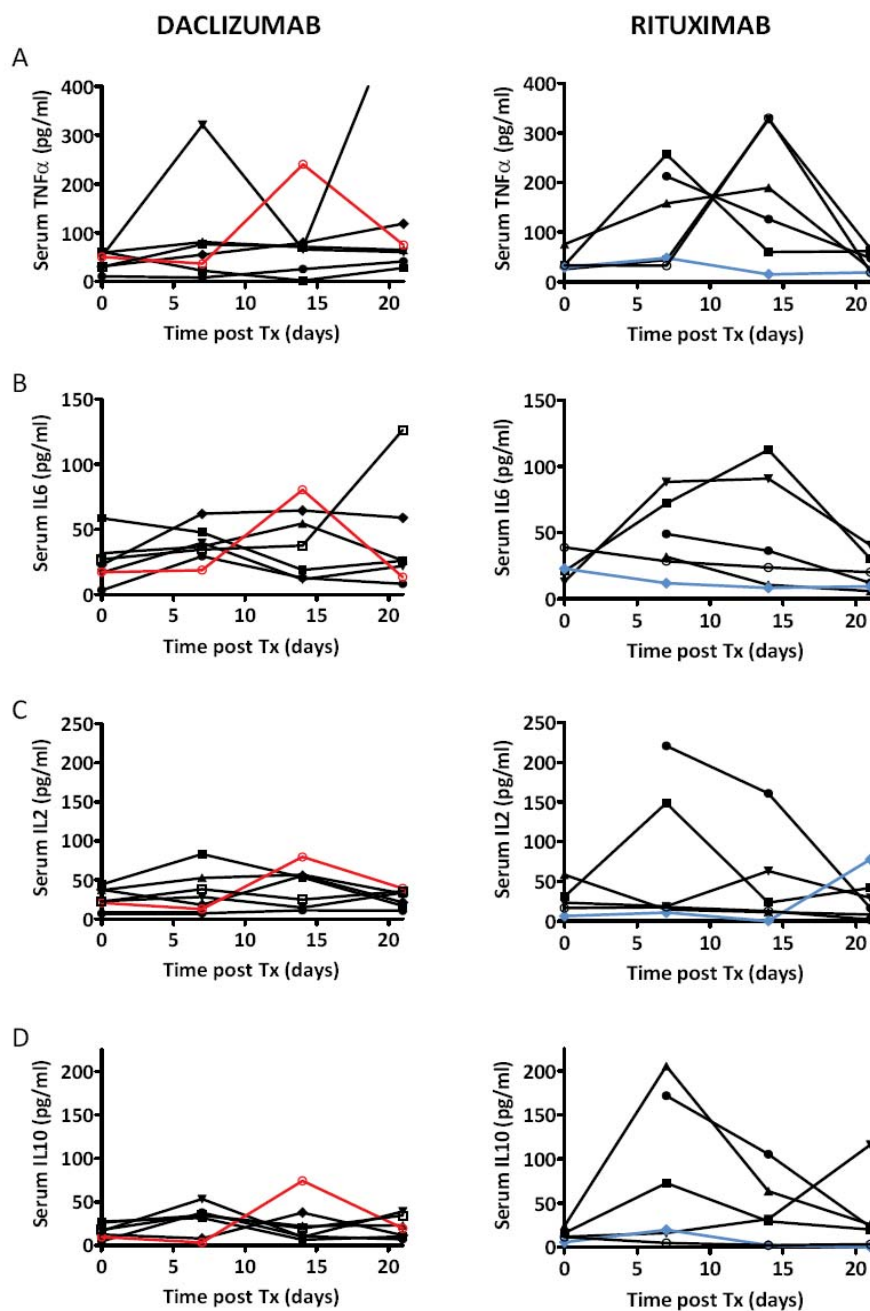

Serum levels of **A.** TNF $\alpha$ , **B.** IL-6, **C.** IL-10, **D.** IL-2 at days 0, 7, 14 and 21 in daclizumab (left hand panel) versus rituximab-treated (right hand panel) patients. The daclizumab- treated patient with rejection is shown in red, whilst the rituximab-treated patient who did not develop rejection is shown in blue. The rise in IL-10 is of interest, since this cytokine is classically considered to play an immunomodulatory role (Ishida H, et al. *J Exp Med* 1994;179:305-10). However, it is a cytokine with both pro- and anti-inflammatory effects (Moore KW, et al. *Annu Rev Immunol* 1993;11:165-90). For example, IL-10 can enhance T cell proliferation (MacNeil IA, et al. *J Immunol* 1990;145:4167-73) and IL-10 production by T cells is associated with increased titres of anti-dsDNA antibodies and with increased proteinuria in NZB/W mice (Enghard P, et al. *Scand J Rheumatol* 2006;35:209-16).

SUPPLEMENTARY FIGURE 3

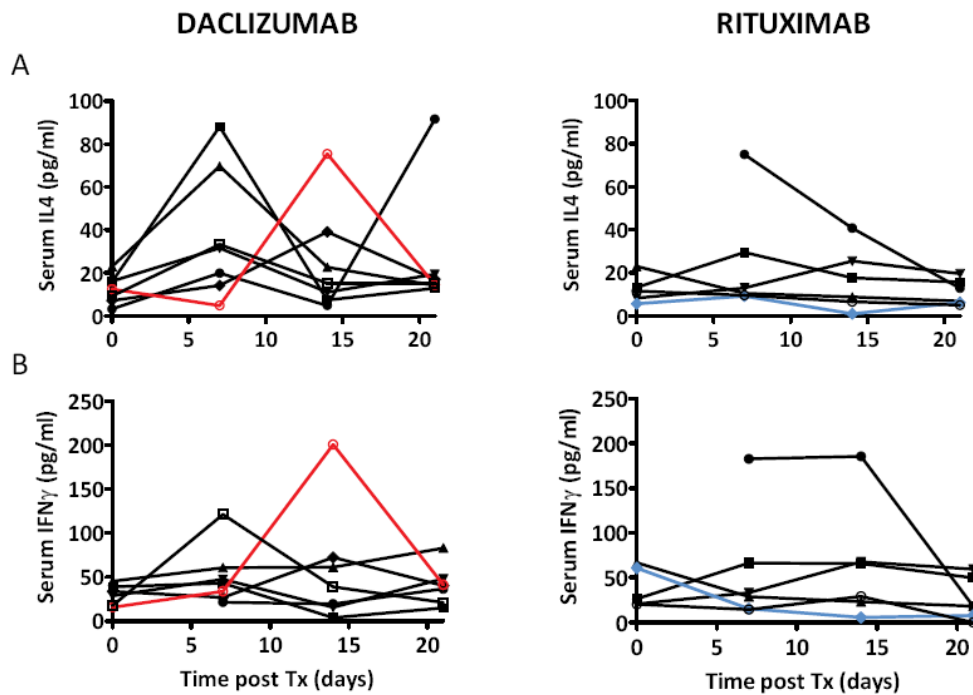

Serum levels of **A.** IL-4, and **B.** IFN- $\gamma$  at days 0, 7,14, 21 in daclizumab (left hand panel) versus rituximab-treated (right hand panel) patients. The daclizumab-treated patient with rejection is shown in red, whilst the rituximab-treated patient who did not develop rejection is shown in blue. Overall, serum IL-4 levels were increased at day 7 and 14 in the daclizumab group compared with baseline(**A**). There was no change in IFN- $\gamma$  levels post-transplantation in either group (**B**).

SUPPLEMENTARY FIGURE 4

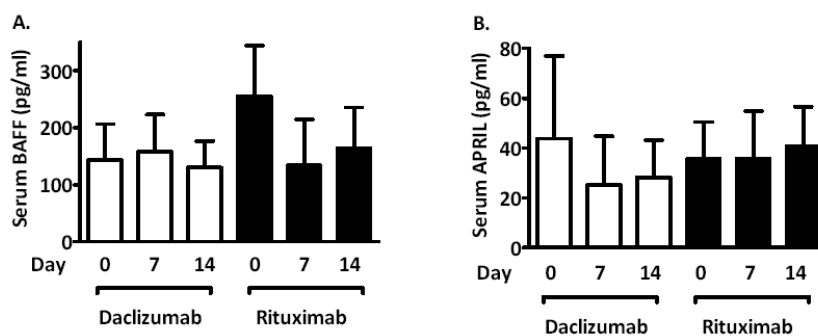

Mean serum levels of **A.** BAFF, and **B.** APRIL at days 0, 7 and 14 in daclizumab (open boxes) versus rituximab-treated (black boxes) patients. Error bars show standard error of mean. Serum BAFF and APRIL levels have been shown to increase following B cell depletion (Pers JO, et al. Arthritis Rheum 2007;56:1464-77) and can drive T cell activation (Mackay F and Leung H. Immunol 2006;18:284-9). However, there was no significant change in BAFF and APRIL levels in either rituximab or daclizumab-treated patients in the post-transplant period.
